# Supplementary material for: Influence of Ni/Mn distributions on the structure and electrochemical properties of Ni-rich cathode materials
Source: Royal Society of Chemistry journal article supplement (doi:10.1039/c8dt03552k), 2018-01-01
Supplement: c8dt03552k1.pdf [file c8dt03552k1.pdf]

## Supplementary Information

### Influence of Ni/Mn distributions on the structure and electrochemical properties of Ni-rich cathode material

Yiming Sun, Zhikun Zhang, Huanhuan Li, Tao Yang, Hongzhou Zhang, Xixi Shi,

Dawei Song and Lianqi Zhang

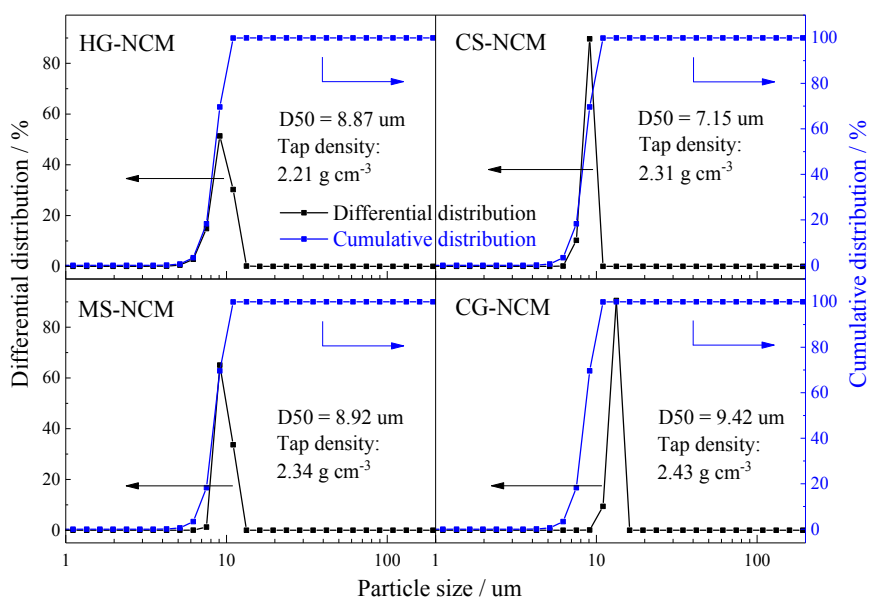

**Fig. S1** Particle size distributions of NCM materials with different Ni/Mn distributions.

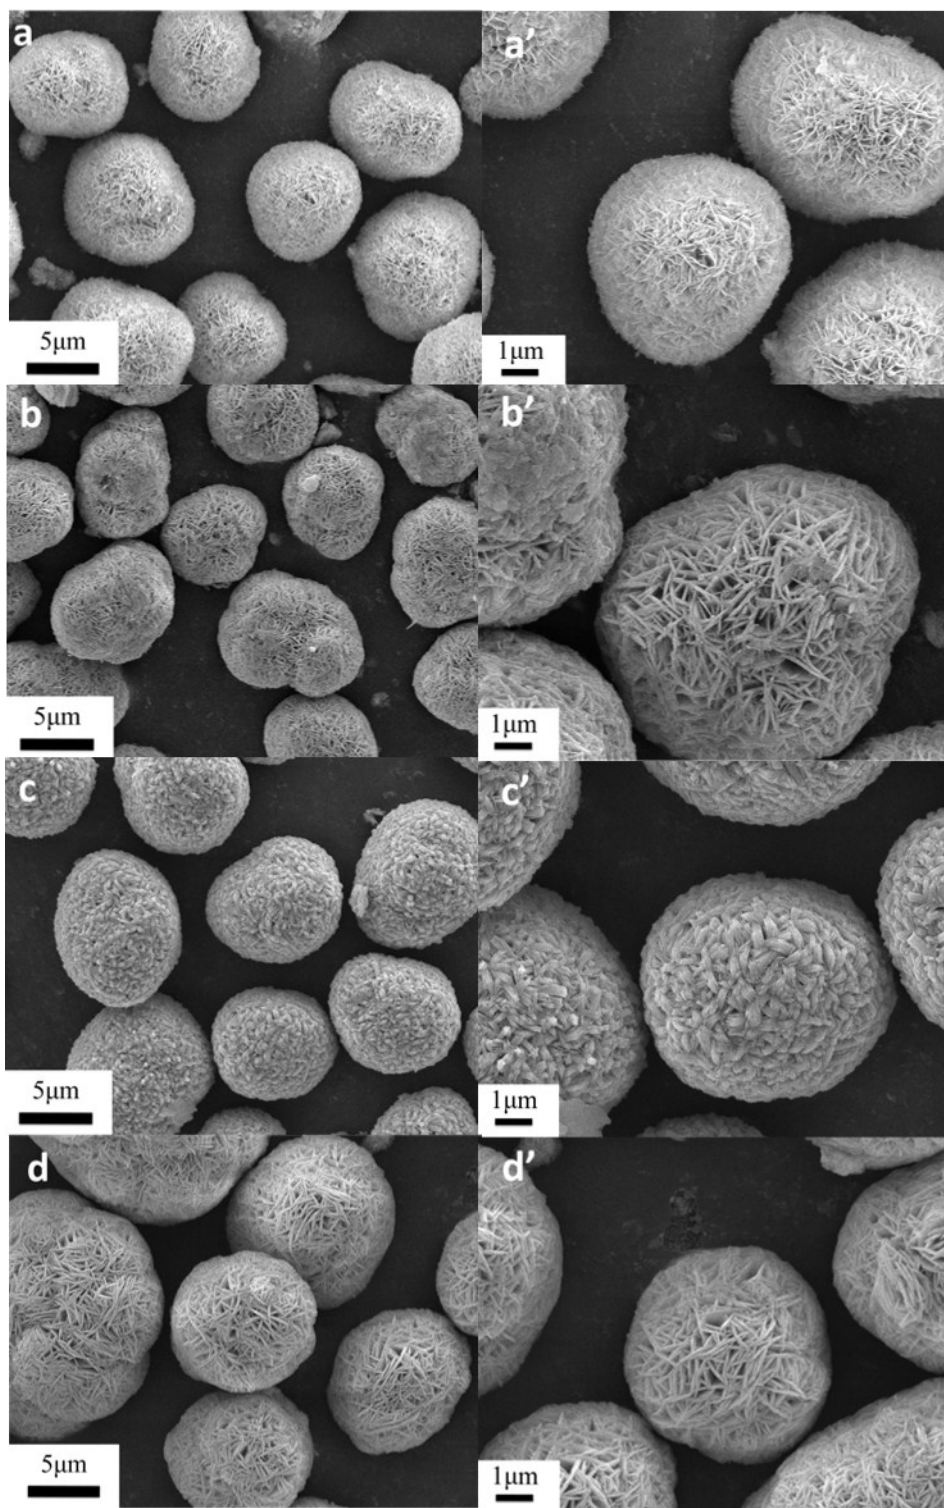

**Fig. S2** SEM images of (a, a') HG-NCM, (b, b') CS-NCM, (c, c') MS-NCM and (d, d') FCG-NCM precursors.

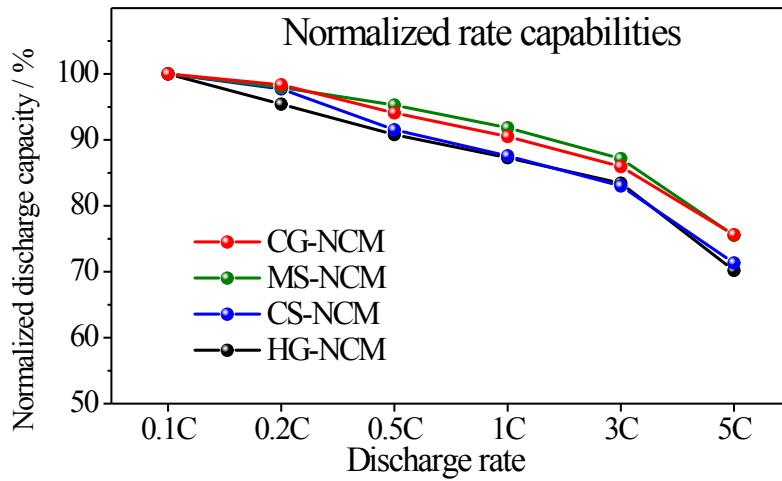

**Fig. S3** Normalized rate capacity vs. discharge rate of NCM cathodes between 3.0 and 4.4 V.

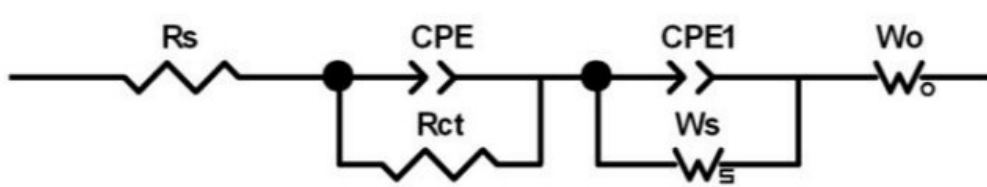

**Fig. S4** Equivalent circuits used to fit the experimental data.  $R_s$  is solution resistance,  $R_{ct}$  is interfacial charge-transfer resistance, CPE is a constant phase element,  $W_o$  is assigned to the semi-infinite Warburg diffusion impedance in the bulk.

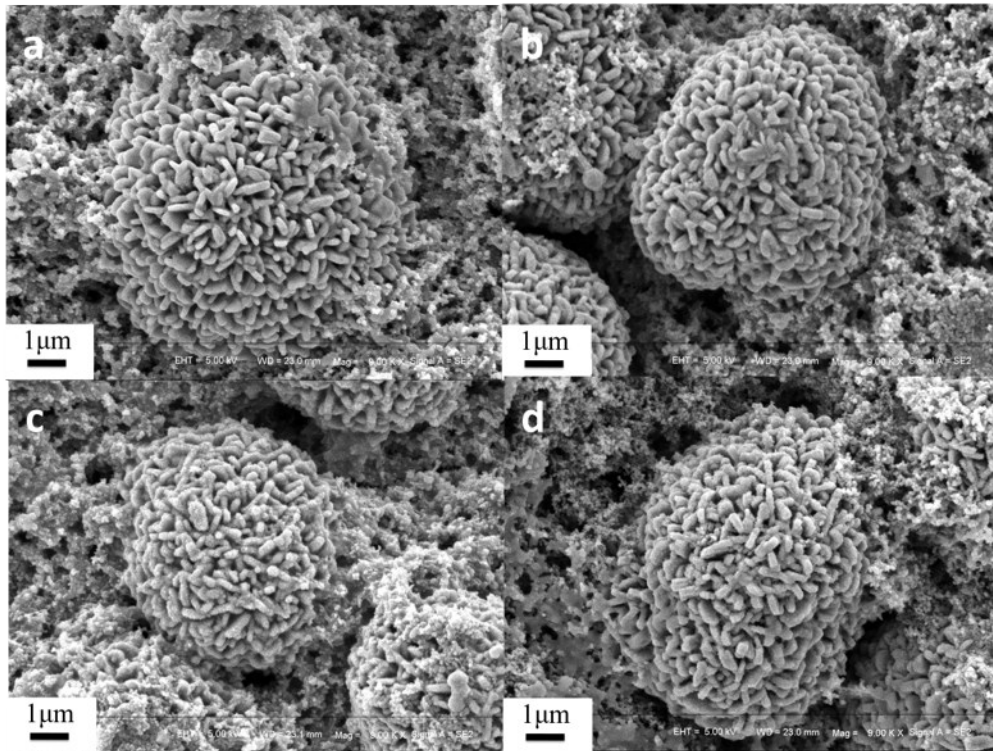

**Fig. S5** SEM images of (a) HG-NCM, (b) CS-NCM, (c) MS-NCM and (d) FCG-NCM cathodes after 200 cycles.

**Table S1** The simulated results from electrochemical impedance spectra and  $\text{Li}^+$  diffusion coefficients obtained at the 10th cycle.

|        | Re ( $\Omega$ ) | Rct ( $\Omega$ ) | $D_{\text{Li}^+}$ ( $\text{cm}^2 \text{s}^{-1}$ ) |
|--------|-----------------|------------------|---------------------------------------------------|
| HG-NCM | 2.128           | 48.16            | $2.53 \times 10^{-13}$                            |
| CS-NCM | 2.061           | 31.04            | $3.52 \times 10^{-1}$                             |
| MS-NCM | 1.243           | 22.27            | $1.95 \times 10^{-12}$                            |
| CG-NCM | 5.607           | 10.06            | $2.97 \times 10^{-12}$                            |

**Table S2** The simulated results of Ni  $2p_{3/2}$  spectra of NCM cathode materials with different Ni/Mn distributions.

|                  |        | $\text{Ni}^{3+}$ |           | $\text{Ni}^{2+}$ |           | $\text{Ni}^{3+}/(\text{Ni}^{3+}+\text{Ni}^{2+})$<br>(%) |
|------------------|--------|------------------|-----------|------------------|-----------|---------------------------------------------------------|
|                  |        | Peak (eV)        | FWHM (eV) | Peak (eV)        | FWHM (eV) |                                                         |
| Fresh samples    | HG-NCM | 856.1            | 1.83      | 854.8            | 1.42      | 75.0                                                    |
|                  | CS-NCM | 856.0            | 1.83      | 855.0            | 1.42      | 71.4                                                    |
|                  | MS-NCM | 856.1            | 1.83      | 855.0            | 1.42      | 70.6                                                    |
|                  | CG-NCM | 856.1            | 1.83      | 855.0            | 1.42      | 72.6                                                    |
| After 200 cycles | HG-NCM | 856.1            | 1.83      | 855.0            | 1.42      | 35.3                                                    |
|                  | CS-NCM | 856.1            | 1.83      | 855.0            | 1.42      | 47.5                                                    |
|                  | MS-NCM | 856.1            | 1.83      | 855.0            | 1.42      | 54.3                                                    |
|                  | CG-NCM | 856.1            | 1.83      | 855.0            | 1.42      | 62.0                                                    |
